# Supplementary material for: Molecular mobility of thin films of poly(bisphenol-A carbonate) capped and with one free surface: from bulk-like samples down to the adsorbed layer
Source: Royal Society of Chemistry journal article supplement (doi:10.1039/d4sm01238k), 2024-12-04
Supplement: d4sm01238k1.pdf [file d4sm01238k1.pdf]

## Supporting Information

Molecular Mobility of Thin Films of Poly (bisphenol-A carbonate) Capped and with one Free Surface: From Bulk-like Samples down to the Adsorbed Layer

Hassan Omar<sup>1</sup>, Shayan Ahmadi<sup>1</sup>, Paulina Szymoniak<sup>1</sup>, and Andreas Schönhals<sup>1,2,\*</sup>

<sup>1</sup>Bundesanstalt für Materialforschung und –prüfung (BAM), Unter den Eichen 87, 12205 Berlin (Germany)

<sup>2</sup>Institut für Chemie, Technische Universität Berlin, Straße des 17. Juni 135, 10623 Berlin, (Germany)

CORRESPONDING AUTHOR: A. Schönhals, BAM Bundesanstalt für Materialforschung und -prüfung (Department 6), Unter den Eichen 87, 12205 Berlin, Germany; Tel. +49 30 / 8104-3384; Fax: +49 30 / 8104-73384; E-Mail: [Andreas.Schoenhals@bam.de](mailto:Andreas.Schoenhals@bam.de)

### Derivative approach:

The Vogel/Fulcher/Tammann equation reads

$$\log f_p = \log f_\infty - \frac{A}{T - T_0} \quad (S1)$$

( $f_\infty$  -relax rate at infinite temperatures,  $T_0$  Vogel temperature, A- fit constant). The derivative with respect to temperature and rearrangement results in

$$\left(\frac{d \log f_p}{dT}\right)^{-1/2} = A^{-1/2}(T - T_0). \quad (S2)$$

A plot of  $\left(\frac{d \log f_p}{dT}\right)^{-1/2}$  versus temperature results in a straight line with  $T_0$  for  $\left(\frac{d \log f_p}{dT}\right)^{-1/2} = 0$ .

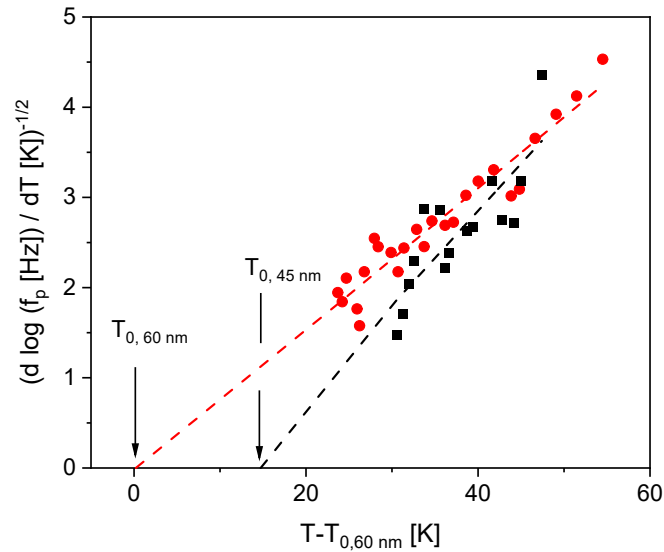

**Figure S1:**  $\left(\frac{d \log f_p}{dT}\right)^{-1/2}$  versus temperature: Red circles – 60 nm; black squares – 45 nm. Dashed lines are linear regressions to the data.

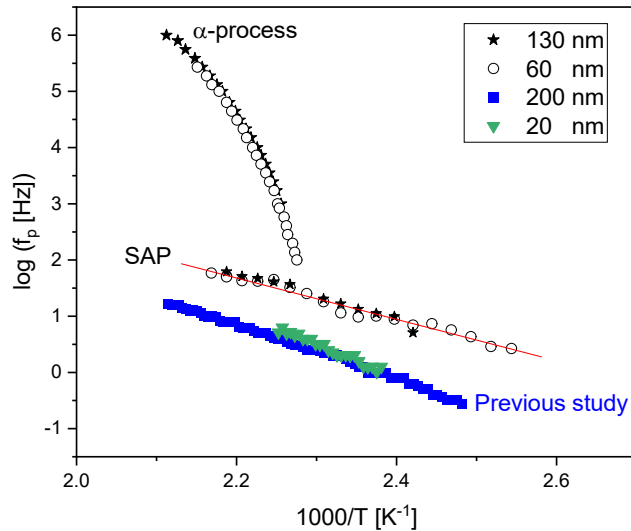

**Figure S2:** Relaxation map showing the  $\alpha$ -relaxation and SAP process for a 130 nm and 60 nm thin film. The SAP found in this study was compared to one found in a previous investigation for a 200 nm and 20 nm PBAC thin film sample. The red line is an Arrhenius fit to the data.

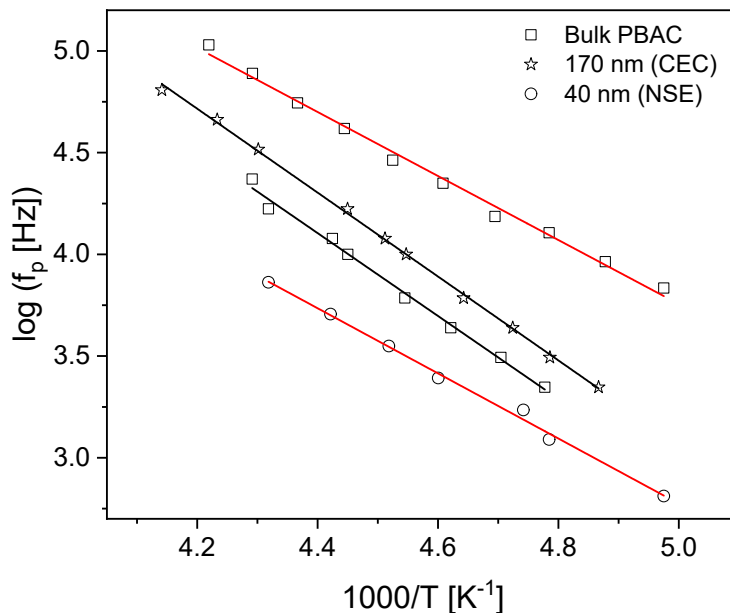

**Figure S3:** Relaxation map showing the  $\beta$ -relaxation processes for a bulk PBAC sample – squares, a 170 nm sample measured with CEC – stars, and a 40 nm sample measured with NSE – circles. The black lines are the Arrhenius fit indicating the  $\pi$ - $\pi$  – flips of the  $\beta$ -relaxation and the red lines indicate the phenylene ring rotations of the  $\beta$ -relaxation.

**Table S1:** Estimated contact angles for each substrate and PBAC

| Material                    | Diiodo-Methane [°] | Ethylene Glycol [°] | Glycerol [°] | Water [°]   |
|-----------------------------|--------------------|---------------------|--------------|-------------|
| Poly(bisphenol A carbonate) | 84.1 ± 2.9         | 75.6                | 94.3 ± 1.2   | 101.5 ± 0.1 |
| SiO <sub>2</sub>            | 83.0 ± 0.8         | 43.3 ± 0.6          | 50.9 ± 0.3   | 64.9 ± 0.1  |
| Aluminum                    | 59.6               | 68.3 ± 0.1          | 82.2         | --          |

**Table S2:** Estimated VFT parameters for the CEC and NSE measured samples

| Thickness [nm] | log (f <sub>∞</sub> [Hz]) | A [K] | T <sub>0</sub> [K] |
|----------------|---------------------------|-------|--------------------|
| Bulk           | 11.5                      | 408.1 | 387.2              |
| 170 – CEC      | 11.5                      | 443.0 | 384.2              |
| 120 – CEC      | 11.5                      | 476.7 | 385.7              |
| 75 – CEC       | 11.5                      | 462.9 | 386.5              |
| 60 – CEC       | 11.5                      | 448.2 | 391.4              |
| 48 – CEC       | 11.5                      | 448.2 | 393.4              |
| 45 – CEC       | 11.5                      | 433.4 | 394.5              |
| 40 – NSE       | 11.5                      | 471.8 | 384.8              |
| 26 – NSE       | 11.5                      | 332.7 | 413.2              |
| 18 – NSE       | 11.5                      | 396.7 | 424.4              |
